# Supplementary material
Source: PubMed Central journal article supplement (PMC5559717)
Supplement: NIHMS854513-supplement-Supp_Data.pdf [file NIHMS854513-supplement-Supp_Data.pdf]

Table S2. Geometric parameter  $\sigma_2$  of 210 interactive-site pairs (nm). “hs” means hard-sphere

|   | G    | A    | V    | P    | T    | S    | N    | D    | R    | K    | E    | Q    | L    | I    | F    | Y    | W    | M    | C    | H    |
|---|------|------|------|------|------|------|------|------|------|------|------|------|------|------|------|------|------|------|------|------|
| G | 0.75 |      |      |      |      |      |      |      |      |      |      |      |      |      |      |      |      |      |      |      |
| A | 0.60 | 0.55 |      |      |      |      |      |      |      |      |      |      |      |      |      |      |      |      |      |      |
| V | 0.70 | 0.65 | 0.65 |      |      |      |      |      |      |      |      |      |      |      |      |      |      |      |      |      |
| P | 0.75 | 0.65 | 0.70 | 0.70 |      |      |      |      |      |      |      |      |      |      |      |      |      |      |      |      |
| T | 0.65 | 0.60 | 0.65 | 0.65 | 0.65 |      |      |      |      |      |      |      |      |      |      |      |      |      |      |      |
| S | hs   | 0.60 | 0.65 | 0.65 | 0.60 | 0.60 |      |      |      |      |      |      |      |      |      |      |      |      |      |      |
| N | 0.65 | 0.62 | 0.70 | 0.65 | 0.70 | 0.70 | 0.65 |      |      |      |      |      |      |      |      |      |      |      |      |      |
| D | 0.60 | 0.65 | hs   | 0.60 | hs   | 0.40 | 0.55 | 0.85 |      |      |      |      |      |      |      |      |      |      |      |      |
| R | 0.65 | 0.65 | hs   | 0.80 | hs   | hs   | 0.50 | 0.80 | 0.65 |      |      |      |      |      |      |      |      |      |      |      |
| K | 0.75 | 0.70 | 0.65 | 0.70 | 0.60 | hs   | 0.70 | 0.80 | 0.80 | 1.00 |      |      |      |      |      |      |      |      |      |      |
| E | 0.65 | 0.65 | hs   | 0.65 | 0.80 | hs   | 0.60 | 0.80 | 0.70 | 0.80 | 0.80 |      |      |      |      |      |      |      |      |      |
| Q | 0.75 | 0.65 | 0.70 | 0.70 | 0.70 | 0.70 | 0.70 | hs   | 0.65 | 0.70 | 0.60 | 0.75 |      |      |      |      |      |      |      |      |
| L | 0.75 | 0.65 | 0.70 | 0.70 | 0.65 | 0.65 | 0.70 | hs   | 0.70 | 0.70 | 0.80 | 0.75 | 0.70 |      |      |      |      |      |      |      |
| I | 0.70 | 0.65 | 0.70 | 0.70 | 0.70 | 0.65 | 0.70 | hs   | hs   | 0.75 | hs   | 0.70 | 0.70 | 0.70 |      |      |      |      |      |      |
| F | 0.75 | 0.65 | 0.70 | 0.70 | 0.65 | 0.60 | 0.70 | 0.68 | 0.55 | 0.65 | 0.75 | 0.75 | 0.70 | 0.70 | 0.70 |      |      |      |      |      |
| Y | 0.70 | 0.60 | 0.60 | 0.70 | 0.65 | 0.60 | 0.70 | 0.80 | 0.70 | 0.65 | 0.85 | 0.70 | 0.70 | 0.70 | 0.70 | hs   |      |      |      |      |
| W | 0.80 | 0.70 | 0.70 | 0.70 | 0.70 | 0.60 | 0.70 | 0.80 | 0.65 | 0.70 | 0.80 | 0.80 | 0.75 | 0.75 | 0.75 | hs   | hs   |      |      |      |
| M | 0.75 | 0.65 | 0.65 | 0.70 | 0.65 | 0.65 | 0.70 | hs   | 0.75 | 0.65 | 0.75 | 0.75 | 0.70 | 0.70 | 0.65 | 0.65 | 0.70 | 0.65 |      |      |
| C | 0.60 | 0.60 | 0.65 | 0.65 | 0.70 | 0.65 | 0.65 | 0.45 | 0.65 | 0.65 | 0.50 | 0.65 | 0.70 | 0.70 | 0.70 | 0.75 | 0.75 | 0.70 | 0.65 |      |
| H | 0.75 | 0.65 | 0.70 | 0.70 | hs   | hs   | 0.70 | 0.55 | 0.60 | 0.70 | 0.58 | 0.75 | 0.70 | 0.70 | 0.70 | 0.70 | 0.70 | 0.70 | 0.75 | 0.75 |

Table S3. Energetic parameter  $\epsilon$  of 210 interactive-site pairs ( $k_B T$ )

|   | G     | A     | V     | P     | T     | S     | N     | D     | R     | K     | E     | Q     | L     | I     | F     | Y     | W     | M     | C     | H     |
|---|-------|-------|-------|-------|-------|-------|-------|-------|-------|-------|-------|-------|-------|-------|-------|-------|-------|-------|-------|-------|
| G | -0.16 |       |       |       |       |       |       |       |       |       |       |       |       |       |       |       |       |       |       |       |
| A | -0.08 | -0.14 |       |       |       |       |       |       |       |       |       |       |       |       |       |       |       |       |       |       |
| V | -0.12 | -0.10 | -0.12 |       |       |       |       |       |       |       |       |       |       |       |       |       |       |       |       |       |
| P | -0.14 | -0.08 | -0.08 | -0.14 |       |       |       |       |       |       |       |       |       |       |       |       |       |       |       |       |
| T | -0.04 | -0.08 | -0.08 | -0.08 | -0.04 |       |       |       |       |       |       |       |       |       |       |       |       |       |       |       |
| S | hs    | -0.11 | -0.08 | -0.06 | -0.04 | -0.06 |       |       |       |       |       |       |       |       |       |       |       |       |       |       |
| N | -0.08 | -0.10 | -0.11 | -0.10 | -0.06 | -0.08 | -0.08 |       |       |       |       |       |       |       |       |       |       |       |       |       |
| D | 0.04  | -0.02 | hs    | 0.04  | hs    | -0.10 | -0.10 | 0.08  |       |       |       |       |       |       |       |       |       |       |       |       |
| R | -0.04 | -0.02 | hs    | -0.08 | hs    | hs    | -0.02 | -0.08 | 0.08  |       |       |       |       |       |       |       |       |       |       |       |
| K | -0.04 | -0.04 | -0.06 | -0.08 | -0.06 | hs    | -0.06 | -0.08 | 0.08  | 0.04  |       |       |       |       |       |       |       |       |       |       |
| E | -0.04 | -0.04 | hs    | -0.04 | 0.04  | hs    | -0.08 | 0.06  | -0.06 | -0.08 | 0.06  |       |       |       |       |       |       |       |       |       |
| Q | -0.12 | -0.11 | -0.08 | -0.10 | -0.08 | -0.04 | -0.08 | hs    | -0.06 | -0.06 | -0.04 | -0.06 |       |       |       |       |       |       |       |       |
| L | -0.14 | -0.12 | -0.10 | -0.10 | -0.08 | -0.10 | -0.10 | hs    | -0.04 | -0.08 | -0.04 | -0.12 | -0.12 |       |       |       |       |       |       |       |
| I | -0.12 | -0.08 | -0.10 | -0.12 | -0.08 | -0.08 | -0.08 | hs    | hs    | -0.04 | hs    | -0.08 | -0.10 | -0.08 |       |       |       |       |       |       |
| F | -0.16 | -0.10 | -0.08 | -0.14 | -0.08 | -0.04 | -0.12 | -0.04 | -0.16 | -0.04 | -0.04 | -0.12 | -0.12 | -0.12 | -0.12 |       |       |       |       |       |
| Y | -0.12 | -0.08 | -0.04 | -0.06 | -0.02 | -0.04 | -0.04 | 0.06  | -0.22 | -0.14 | 0.04  | -0.08 | -0.08 | -0.06 | -0.08 | hs    |       |       |       |       |
| W | -0.12 | -0.08 | -0.08 | -0.12 | -0.04 | -0.04 | -0.06 | 0.06  | -0.24 | -0.28 | 0.040 | -0.08 | -0.10 | -0.08 | -0.08 | hs    | hs    |       |       |       |
| M | -0.14 | -0.10 | -0.10 | -0.12 | -0.04 | -0.06 | -0.12 | hs    | -0.10 | -0.10 | -0.04 | -0.12 | -0.11 | -0.11 | -0.10 | -0.08 | -0.10 | -0.10 |       |       |
| C | -0.08 | -0.08 | -0.08 | -0.08 | -0.08 | -0.06 | -0.10 | -0.30 | -0.11 | -0.08 | -0.24 | -0.07 | -0.10 | -0.08 | -0.10 | -0.05 | -0.08 | -0.08 | -0.07 |       |
| H | -0.08 | -0.08 | -0.10 | -0.10 | hs    | hs    | -0.08 | -0.15 | -0.04 | -0.04 | -0.12 | -0.10 | -0.12 | -0.12 | -0.11 | -0.10 | -0.10 | -0.08 | -0.06 | -0.06 |
